# Supplementary material
Source: PubMed Central journal article supplement (PMC4860678)
Supplement: cg5b01580_si_001.pdf [file cg5b01580_si_001.pdf]

## Supporting Information

### Detergent-mediated formation of $\beta$ -hematin: Heme crystallization promoted by detergents implicates nanostructure formation for use as a biological mimic

*Rebecca D. Sandlin<sup>ψ†</sup>, Kim Y. Fong<sup>ψ†</sup>, Renata Stiebler<sup>ψ#</sup>, Christopher P. Gulka<sup>ψ</sup>, Jenny E. Nesbitt<sup>ψ</sup>, Matheus P. Oliveira<sup>§</sup>, Marcus F. Oliveira<sup>§</sup>, David W. Wright<sup>ψ\*</sup>*

<sup>ψ</sup>Department of Chemistry, Vanderbilt University, Nashville, Tennessee, United States of  
America

<sup>#</sup>Laboratório de Biologia Celular, Instituto Oswaldo Cruz, Fundação Oswaldo Cruz, Rio de  
Janeiro, Brazil

<sup>§</sup>Laboratório de Bioquímica de Resposta ao Estresse, Programa de Biologia Molecular e  
Biotecnologia, Instituto de Bioquímica Médica, Leopoldo de Meis, Universidade Federal do Rio  
de Janeiro, RJ, Brazil

## Supporting Information

### SI 1: Kinetic curves of detergent-mediated $\beta$ -hematin formation

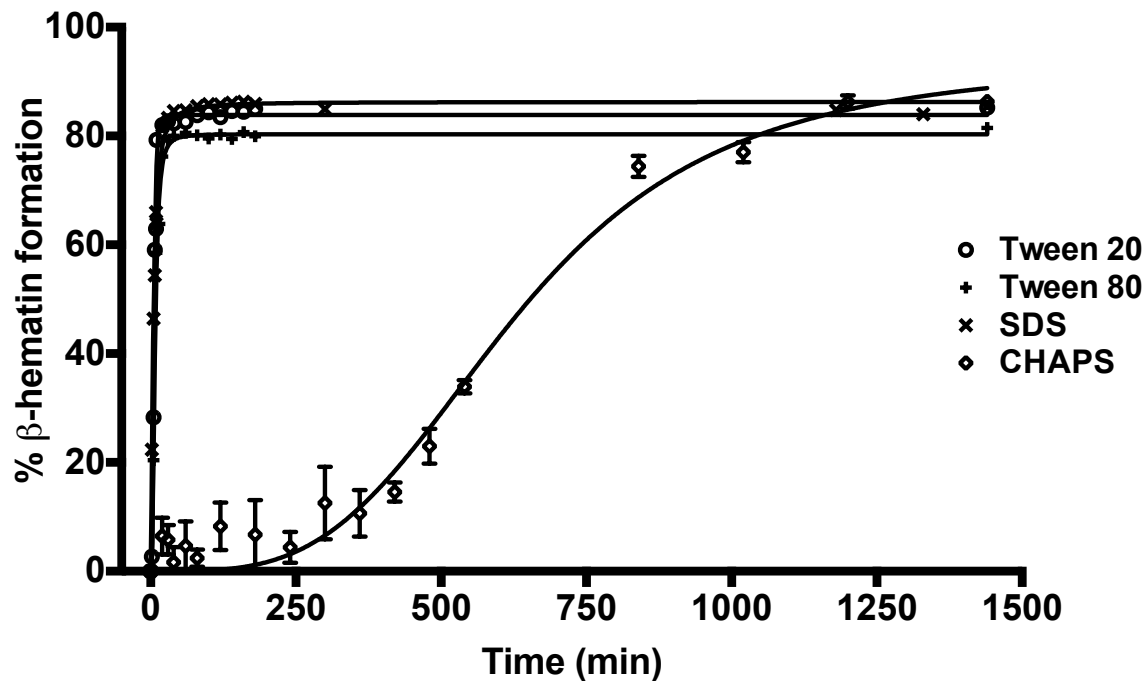

**Figure SI1.** The detergent-mediated  $t_{1/2}$  of  $\beta$ -hematin formation calculated through the pyridine-ferrochrome method following incubation of a  $50\text{-}\mu\text{M}$  heme solution with each detergent at  $50\text{ }\mu\text{M}$ . Samples were incubated at  $37^\circ\text{C}$ , and pH 4.8 while shaking with triplicate aliquots removed at regular time intervals. The average half-lives with standard deviation were calculated using the sigmoidal dose-response (variable slope) analysis on GraphPad Prism v5.0.

SI 2: XRD patterns of  $\beta$ -hematin products formed by various detergents

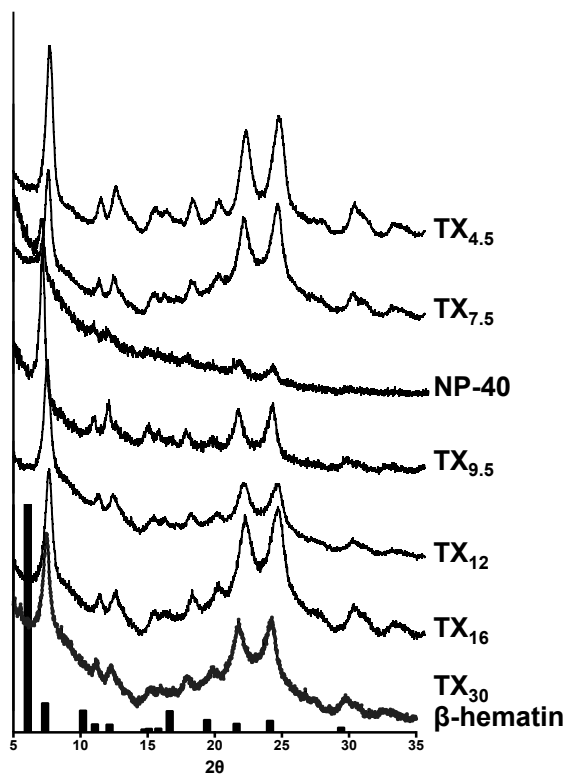

**Figure SI2:** XRD patterns of the  $\beta$ -hematin products obtained through incubation of heme with NP-40 and the Triton-X series of detergent mediators. The XRD pattern of  $\beta$ -hematin synthesized by the aqueous acid-catalyzed method by Slater et al. is shown in the black bars.<sup>33</sup>

SI3: TEM images of  $\beta$ -hematin products formed by various detergents

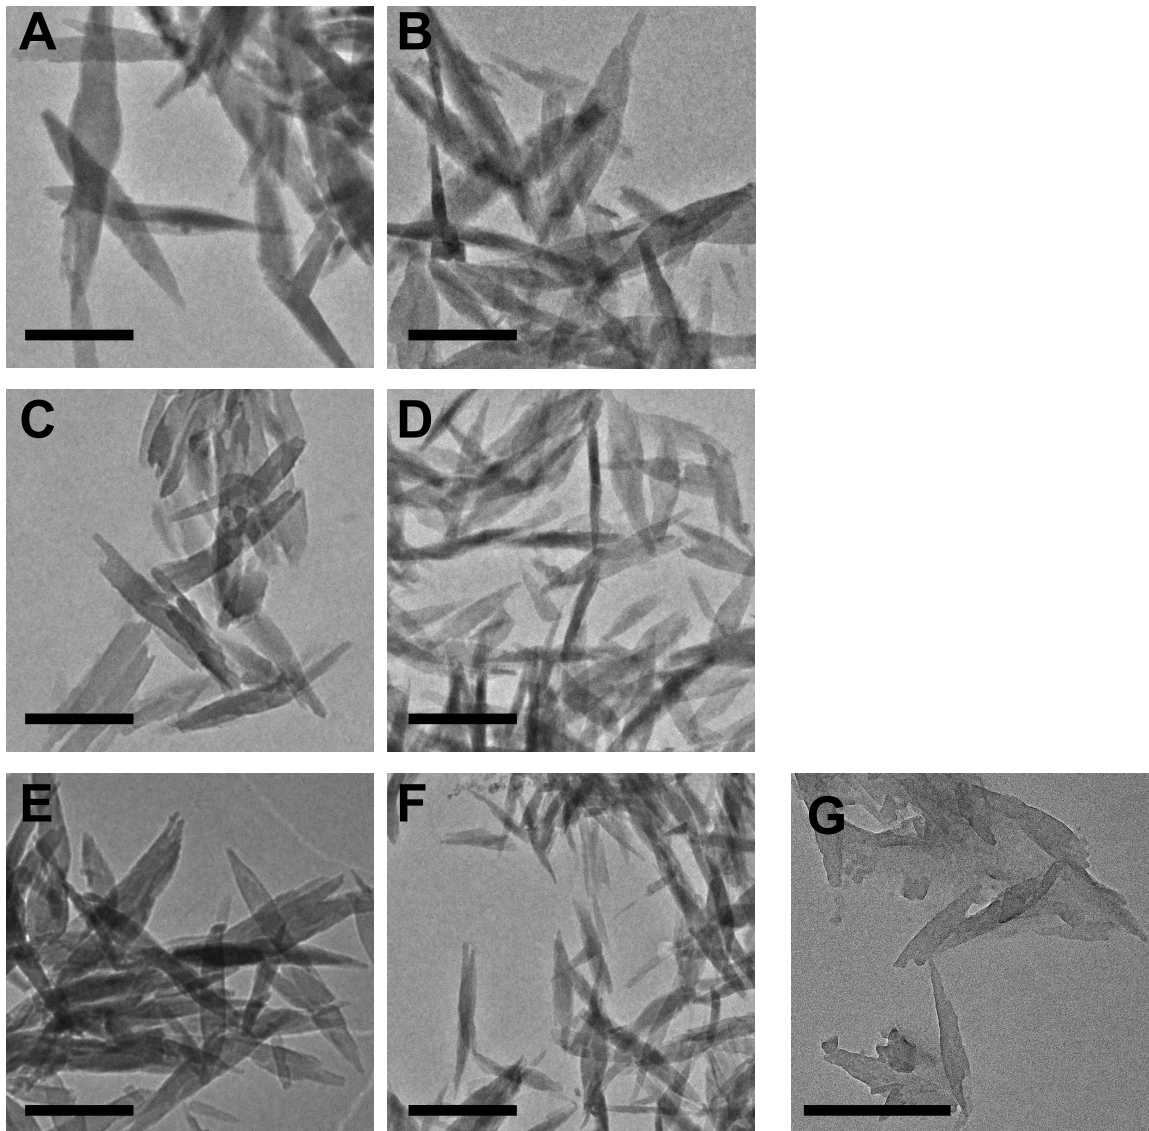

**Figure SI3:** The external morphology of product obtained from incubation of heme with (A) TX<sub>4.5</sub> (B) TX<sub>7.5</sub> (C) TX<sub>9.5</sub> (D) TX<sub>12</sub> (E) TX<sub>16</sub> (F) TX<sub>30</sub> and (G) NP-40 at 37 °C and pH 4.8 reveal well-formed crystals that resemble hemozoin. Scale bar is 500 nm.

SI4: TEM images of NP-40 and Triton X-305 detergent aggregates

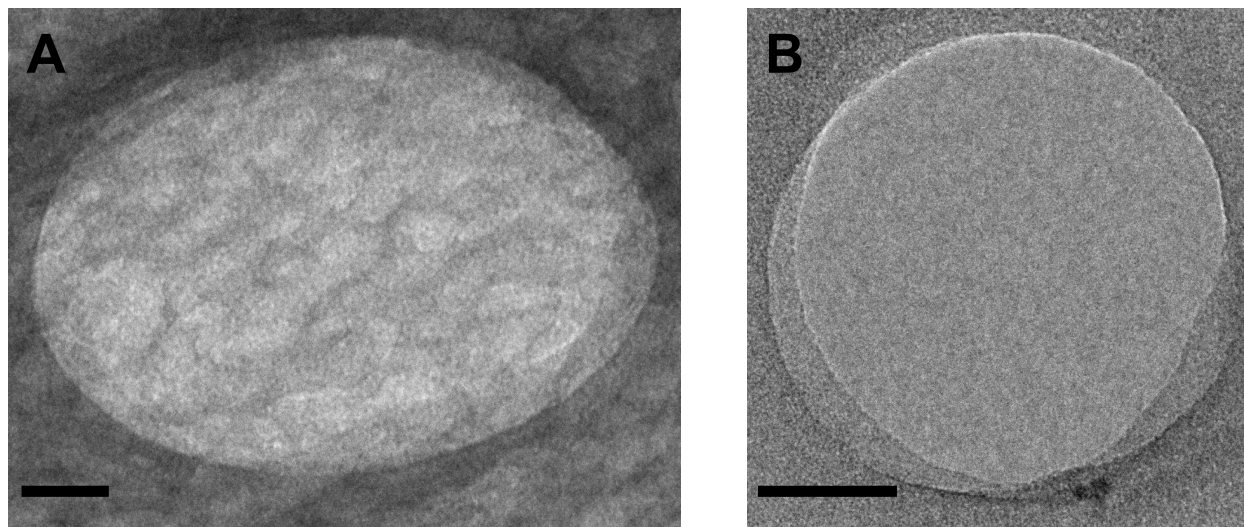

**Figure SI4.** TEM images of (A) NP-40 and (B) Triton X-305 detergent aggregate structures.

Scale bars are 50 nm.

SI5: Avrami kinetics of  $\beta$ -formation by Triton X-45 and Triton X-305

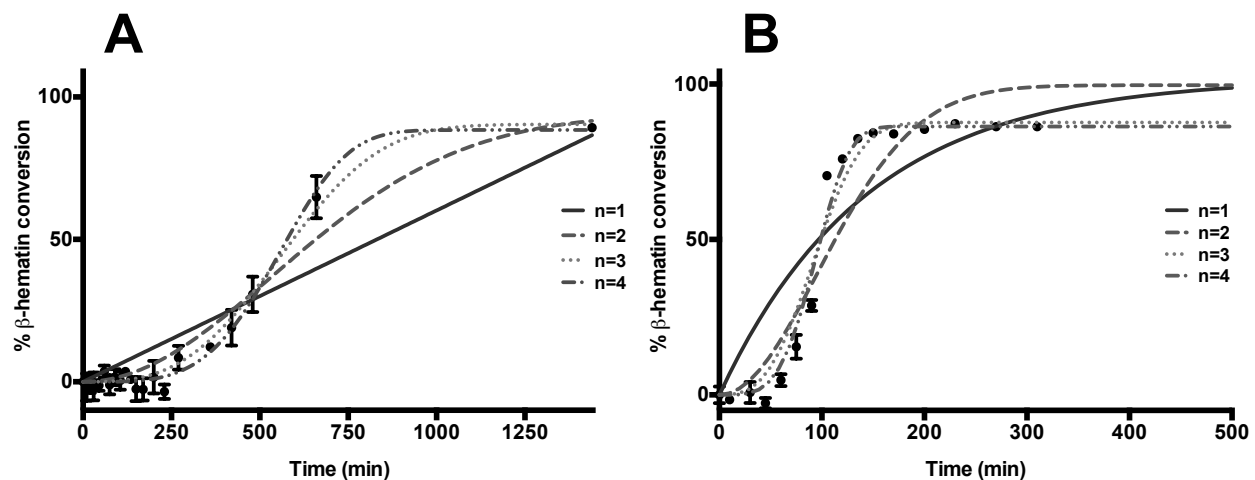

**Figure SI5.** The kinetics data were fit to the Avrami equation.  $\beta$ -hematin formation mediated by (A) TX<sub>4.5</sub> and (B) TX<sub>30</sub> exhibited best fit to  $n = 4$ .  $n=1$  ( $r^2 = 0.85, 0.80$ ),  $n = 2$  ( $r^2 = 0.95, 0.90$ ),  $n = 3$  ( $r^2 = 0.989, 0.97$ ) and  $n = 4$  ( $r^2 = 0.99, 0.99$ ) with  $r^2$  listed for TX<sub>4.5</sub> and TX<sub>30</sub>, respectively.
